# Supplementary material for: Modulating the antioxidant system by exogenous 2-(3,4-dichlorophenoxy) triethylamine in maize seedlings exposed to polyethylene glycol-simulated drought stress
Source: PLoS One. 2018 Sep 5;13(9):e0203626. doi: 10.1371/journal.pone.0203626 (PMC6124772; doi:10.1371/journal.pone.0203626)
Supplement: S1 File — This file contains date including the RGR of the shoots and roots. (XLSX) [file pone.0203626.s001.xlsx]

## Sheet: Sheet1
		Relative growth rate(mg DW day-1)
		Treatment	shoot					root
		Control	74	80.6	77	84.2	82.4	80.4	74.2	82.2	80.6	77
		DCPTA	91	89.4	86.4	84.2	85.2	83.4	85.2	87.8	85.4	85
		PEG	42.6	50.6	53	54.4	57.2	59.2	55.2	53.2	59.2	57.2
		PEG+DCPTA	62	59.6	66	60.4	64.2	65	69.4	63.6	64.4	67.8
